# Supplementary material
Source: ML conference proceedings conference paper supplement (https://openreview.net/forum?id=qeaT2O5fNKC)
Supplement: supplementary_material [file attachment]

# A Theory of the Distortion-Perception Tradeoff in Wasserstein Space - Supplementary Material

In Appendix A we present the distortion-perception tradeoff in general metric spaces. We formulate the problem of finding a perfect perceptual quality estimator as an optimal transportation problem, and extend some of the background provided in Sec. 2. In Appendix B we provide detailed proofs of the results appearing in the paper. In Appendix C we discuss the implications of our results on the DP tradeoff with divergences other than the Wasserstein-2. Appendix D examines settings where covariance matrices commute. In Appendix E we discuss the details of the numerical illustrations of Sec. 5 and provide additional visual results. Appendix F summarizes the results in the paper.

## A Background and extensions

### A.1 The distortion-perception function

In Sec. 2 of the main text we presented the setting of Euclidean space for simplicity. For the sake of completeness, we present here a more general setup.

Let  $X, Y$  be random variables on separable metric spaces  $\mathcal{X}, \mathcal{Y}$ , with joint probability  $p_{X,Y}$  on  $\mathcal{X} \times \mathcal{Y}$ . Given a distortion function  $d : \mathcal{X} \times \mathcal{X} \rightarrow \mathbb{R}^+ \cup \{0\}$ , we aim to find an estimator  $\hat{X} \in \mathcal{X}$  defined by a conditional distribution  $p_{\hat{X}|Y}$  (which induces a marginal distribution  $p_{\hat{X}}$ ), minimizing the expectation  $\mathbb{E}[d(X, \hat{X})]$  under the constraint  $d_p(p_X, p_{\hat{X}}) \leq P$ . Here,  $d_p$  is some divergence between probability measures. We further assume the Markov relation  $X \rightarrow Y \rightarrow \hat{X}$ , i.e.  $X, \hat{X}$  are independent given  $Y$ . Similarly to Blau and Michaeli [4] we define the distortion-perception function

$$D(P) = \min_{p_{\hat{X}|Y}} \left\{ \mathbb{E}[d(X, \hat{X})] : d_p(p_X, p_{\hat{X}}) \leq P \right\}. \quad (27)$$

The expectation is taken w.r.t. the joint probability  $p_{\hat{X}YX}$  induced by  $p_{\hat{X}|Y}$  and  $p_{XY}$ , where  $\hat{X}$  and  $X$  are independent given  $Y$ . We can write (27) as

$$D(P) = \min_{p_{\hat{X}|Y}} \left\{ J(p_{\hat{X}|Y}) : d_p(p_X, p_{\hat{X}}) \leq P \right\}, \quad (28)$$

where we defined  $J(p_{\hat{X}|Y}) \triangleq \mathbb{E}_{p_{\hat{X}YX}}[d(X, \hat{X})]$ . This objective can be written as

$$J(p_{\hat{X}|Y}) = \mathbb{E}_{p_{\hat{X}YX}} \mathbb{E}[d(X, \hat{X})|Y, \hat{X}]. \quad (29)$$

Let us define the cost function

$$\begin{aligned} \rho(\hat{x}, y) &\triangleq \mathbb{E}[d(X, \hat{X})|Y = y, \hat{X} = \hat{x}] \\ &= \mathbb{E}[d(X, \hat{x})|Y = y], \end{aligned} \quad (30)$$

where we used the fact that  $X$  is independent of  $\hat{X}$  given  $Y$ . Then we have that the objective (29) boils down to  $J(p_{\hat{X}|Y}) = \mathbb{E}_{p_{\hat{X}Y}} \rho(\hat{X}, Y)$ .

The problem of finding a *perfect* perceptual quality estimator can be now written as an optimal transport problem

$$D(P=0) = \min_{p_{\hat{X}|\tilde{Y}}} \mathbb{E}_{p_{\hat{X}\tilde{Y}}} \rho(\hat{X}, \tilde{Y}) \quad \text{s.t. } p_{\hat{X}} = p_X, p_{\tilde{Y}} = p_Y.$$

In the setting where  $\mathcal{X}, \mathcal{Y}$  are Euclidean spaces, considering the MSE distortion  $d(x, \hat{x}) = \|x - \hat{x}\|^2$ , we write

$$\begin{aligned} \rho(\hat{x}, y) &= \mathbb{E} \left[ \|X - \hat{X}\|^2 | Y = y, \hat{X} = \hat{x} \right] \\ &= \mathbb{E} \left[ \|X - \hat{x}\|^2 | Y = y \right] \\ &= \mathbb{E} \left[ \|X\|^2 | Y = y \right] - 2\hat{x}^T \mathbb{E} [X | Y = y] + \|\hat{x}\|^2 \\ &= \mathbb{E} \left[ \|X - X^*\|^2 | Y = y \right] + \left\{ \mathbb{E} \left[ \|X^*\|^2 | Y = y \right] - 2\hat{x}^T \mathbb{E} [X | Y = y] + \|\hat{x}\|^2 \right\} \end{aligned}$$

and we have

$$\begin{aligned} J(p_{\hat{X}|Y}) &= \mathbb{E}_{p_{\hat{X}Y}} \rho(\hat{X}, Y) = \mathbb{E}_{p_{YX}} \mathbb{E} [\|X - X^*\|^2 | Y] + \mathbb{E}_{p_{\hat{X}Y}} \mathbb{E} [\|\hat{X} - X^*\|^2 | Y, \hat{X}] \\ &= D^* + \mathbb{E}_{p_{\hat{X}Y}} [\|\hat{X} - X^*\|^2]. \end{aligned}$$

## A.2 The optimal transportation problem

Assume  $\mathcal{X}, \mathcal{Y}$  are Radon spaces [2]. Let  $\rho : \mathcal{X} \times \mathcal{Y} \rightarrow \mathbb{R}$  be a non-negative Borel cost function, and let  $q^{(x)}, p^{(y)}$  be probability measures on  $\mathcal{X}, \mathcal{Y}$  respectively. The optimal transport problem is then given in the following formulations.

In the *Monge* formulation, we search for an optimal transformation, often referred to as an *optimal map*,  $T : \mathcal{Y} \rightarrow \mathcal{X}$  minimizing

$$\mathbb{E} \rho(T(Y), Y), \text{ s.t. } Y \sim q^{(y)}, T(Y) \sim q^{(x)}. \quad (31)$$

Note that the Monge problem seeks for a deterministic map, and might not have a solution.

In the *Kantorovich* formulation, we wish to find a probability measure  $q = q_{XY}$  on  $\mathcal{X} \times \mathcal{Y}$ , minimizing

$$\mathbb{E}_q \rho(X, Y), \text{ s.t. } q \in \Pi(q^{(x)}, p^{(y)}), \quad (32)$$

where  $\Pi$  is the set of probabilities on  $\mathcal{X} \times \mathcal{Y}$  with marginals  $q^{(x)}, p^{(y)}$ . A probability minimizing (32) is called an *optimal plan*, and we denote  $q \in \Pi_o(q^{(x)}, p^{(y)})$ . Note that when  $\rho(x, y) = d^p(x, y)$  and  $d(x, y)$  is a metric, taking inf over (32) yields the Wasserstein distance  $W_p^p(q^{(x)}, p^{(y)})$  induced by  $d(x, y)$ .

In the case where  $\mathcal{X} = \mathcal{Y} = \mathbb{R}^d$  and  $\rho(x, y) = \|x - y\|^2$  is the quadratic cost (and we assume  $q^{(x)}, p^{(y)}$  have finite first and second moments), there exists an optimal plan minimizing (32). If  $p^{(y)}$  is absolutely continuous (w.r.t Lebesgue measure), this plan is given by an optimal map which is the unique solution to (31) [20, p.5,16].

## A.3 Optimal maps between Gaussian measures

When  $\mu_1 = \mathcal{N}(m_1, \Sigma_1)$  and  $\mu_2 = \mathcal{N}(m_2, \Sigma_2)$  are Gaussian distributions on  $\mathbb{R}^d$ , we have that

$$W_2^2(\mu_1, \mu_2) = \|m_1 - m_2\|_2^2 + \text{Tr} \left\{ \Sigma_1 + \Sigma_2 - 2 \left( \Sigma_1^{\frac{1}{2}} \Sigma_2 \Sigma_1^{\frac{1}{2}} \right)^{\frac{1}{2}} \right\}. \quad (33)$$

If  $\Sigma_1$  and  $\Sigma_2$  are non-singular, then the distribution attaining the optimum in (3) corresponds to

$$U \sim \mathcal{N}(m_1, \Sigma_1), \quad V = m_2 + T_{1 \rightarrow 2}(U - m_1), \quad (34)$$

where

$$T_{1 \rightarrow 2} = \Sigma_1^{-\frac{1}{2}} \left( \Sigma_1^{\frac{1}{2}} \Sigma_2 \Sigma_1^{\frac{1}{2}} \right)^{\frac{1}{2}} \Sigma_1^{-\frac{1}{2}} \quad (35)$$

is the optimal transformation pushing forward from  $\mathcal{N}(0, \Sigma_1)$  to  $\mathcal{N}(0, \Sigma_2)$  [12]. This transformation satisfies  $\Sigma_2 = T_{1 \rightarrow 2} \Sigma_1 T_{1 \rightarrow 2}$ .

When distributions are singular, we have the following.

**Lemma 1.** [33, Theorem 3] *Let  $\mu$  and  $\nu$  be two centered Gaussian measures defined on  $\mathbb{R}^n$ . Let  $P_\mu$  be the projection matrix onto  $\text{Im}\{\Sigma_\mu\}$ . Then the optimal transport map  $T_{\mu \rightarrow P_\mu \# \nu}$  from  $\mu$  to  $P_\mu \# \nu$  is linear and self-adjoint, and can be written as*

$$T_{\mu \rightarrow P_\mu \# \nu} = (\Sigma_\mu^{1/2})^\dagger (\Sigma_\mu^{1/2} \Sigma_\nu \Sigma_\mu^{1/2})^{1/2} (\Sigma_\mu^{1/2})^\dagger.$$

*In the case  $\text{Im}\{\Sigma_\nu\} \subseteq \text{Im}\{\Sigma_\mu\}$  we have  $P_\mu \# \nu = \nu$ , hence  $T_{\mu \rightarrow \nu} = T_{\mu \rightarrow P_\mu \# \nu}$  is the optimal transport map from  $\mu$  to  $\nu$ , even where measures are singular.*

## B Proof of main results

In this Section we provide proofs of the main results of this paper. In lemmas 2 and 3 we present some alternative representations for  $D(P)$ . In Lemma 4 we obtain a lower bound on  $D(P)$ . We then prove Theorem 3 (via a more general result given by Lemma 5), where the lower bound of Lemma 4 is attained. Equipped with Theorem 3, we prove Theorem 1 which is the main result of our paper.

### B.1 Relations between $D(P)$ and $X^*$

In this section we relate the distortion-perception function  $D(P)$  given in (2) to the estimator  $X^* = \mathbb{E}[X|Y]$ . Recall that  $D^* = \mathbb{E}[\|X - X^*\|^2]$  and  $P^* = W_2(p_X, p_{X^*})$ .

**Lemma 2.** *If  $\hat{X}$  is independent of  $X$  given  $Y$ , then its MSE can be decomposed as  $\mathbb{E}[\|X - \hat{X}\|^2] = \mathbb{E}[\|X - X^*\|^2] + \mathbb{E}[\|X^* - \hat{X}\|^2]$  and hence*

$$D(P) = D^* + \min_{p_{\hat{X}|Y}} \left\{ \mathbb{E}_{p_{\hat{X}|Y}} [\|\hat{X} - X^*\|^2] : W_2(p_{\hat{X}}, p_X) \leq P \right\}. \quad (36)$$

*Proof.* For any estimator we can write the MSE

$$\mathbb{E}[\|X - \hat{X}\|^2] = \mathbb{E}[\|X - X^*\|^2] + \mathbb{E}[\|\hat{X} - X^*\|^2] - 2\mathbb{E}[(X - X^*)^T(\hat{X} - X^*)]. \quad (37)$$

Since in our case  $\hat{X}$  is independent of  $X$  given  $Y$ , we show that the third term vanishes.

$$\begin{aligned} \mathbb{E}[(X - X^*)^T(\hat{X} - X^*)] &= \mathbb{E}[\mathbb{E}(X - X^*)^T(\hat{X} - X^*)|Y] \\ &= \mathbb{E}\left[\underbrace{\mathbb{E}[(X - X^*)^T|Y]}_{=0} \mathbb{E}(\hat{X} - X^*)|Y\right] = 0. \end{aligned}$$

Since  $X^*$  is a deterministic function of  $Y$ ,  $D^* = \mathbb{E}[\|X - X^*\|^2]$  is a property of the problem, and does not depend on the choice of  $p_{\hat{X}|Y}$ , which, in view of (37) completes the proof.  $\square$

Next, we express  $D(P)$  in terms of the Wasserstein distance between  $p_{\hat{X}}$  and  $p_{X^*}$ .

**Lemma 3** (Eq. (14)).

$$D(P) = D^* + \min_{p_{\hat{X}}} \{W_2^2(p_{\hat{X}}, p_{X^*}) : W_2(p_{\hat{X}}, p_X) \leq P\}. \quad (38)$$

*Proof.* Denote  $W_2^2(\mathcal{B}_P, p_{X^*}) = \min_{p_{\hat{X}}: W_2(p_{\hat{X}}, p_X) \leq P} W_2^2(p_{\hat{X}}, p_{X^*})$ , where  $\mathcal{B}_P$  is the ball of radius  $P$  around  $p_X$  in Wasserstein space.

From Lemma 2 we have

$$D(P) = D^* + \min_{p_{\hat{X}|Y}: W_2(p_{\hat{X}}, p_X) \leq P} \mathbb{E}_{p_{\hat{X}|Y}} [\|\hat{X} - X^*\|^2]. \quad (39)$$

For every  $p_{\hat{X}|Y}$  whose marginal attains  $W_2(p_{\hat{X}}, p_X) \leq P$  we have,

$$\begin{aligned} \mathbb{E}_{p_{\hat{X}|Y}} [\|\hat{X} - X^*\|^2] &\geq \inf_{q \in \Pi(p_{\hat{X}}, p_{X^*})} \mathbb{E}_q [\|\hat{X} - X^*\|^2] \\ &= W_2^2(p_{\hat{X}}, p_{X^*}) \\ &\geq \min_{p_{\hat{X}}: W_2(p_{\hat{X}}, p_X) \leq P} W_2^2(p_{\hat{X}}, p_{X^*}), \end{aligned}$$

which leads to  $D(P) \geq D^* + W_2^2(\mathcal{B}_P, p_{X^*})$ .

Conversely, given  $p_{\hat{X}}$  such that  $W_2(p_{\hat{X}}, p_X) \leq P$ , we have an optimal plan  $p_{\hat{X}X^*}$  achieving  $W_2(p_{\hat{X}}, p_{X^*})$ . Once we determine the optimal plan  $p_{\hat{X}X^*}$  with marginal  $p_{\hat{X}}$ , we have an estimator  $\hat{X}$  given by  $p_{\hat{X}|Y}$  achieving  $\mathbb{E}_{p_{\hat{X}|Y}} [\|\hat{X} - X^*\|^2] = W_2^2(p_{\hat{X}}, p_{X^*})$  (for the connection between the

optimal plan  $p_{\hat{X}X^*}$  and the choice of a consistent  $p_{\hat{X}|Y}$ , see Remark about uniqueness in Sec. 3.1). We then have

$$\min_{p_{\hat{X}|Y}: W_2(p_{\hat{X}}, p_X) \leq P} \mathbb{E}_{p_{\hat{X}|Y}} \left[ \|\hat{X} - X^*\|^2 \right] \leq \mathbb{E}_{p_{\hat{X}|Y}} \left[ \|\hat{X} - X^*\|^2 \right] = W_2^2(p_{\hat{X}}, p_{X^*}).$$

Taking the minimum over  $p_{\hat{X}}$  yields  $D(P) \leq D^* + W_2^2(\mathcal{B}_P, p_{X^*})$ . Combining the upper and lower bounds, we obtain the desired result.  $\square$

For the proof of Theorem 3, we first prove the following

**Lemma 4.**  $D(P) \geq D^* + [(P^* - P)_+]^2$ .

*Proof.* For every estimator satisfying  $W_2(p_{\hat{X}}, p_X) \leq P$ , we have from the triangle inequality

$$P^* = W_2(p_X, p_{X^*}) \leq W_2(p_{\hat{X}}, p_{X^*}) + W_2(p_{\hat{X}}, p_X) \leq W_2(p_{\hat{X}}, p_{X^*}) + P, \quad (40)$$

yielding

$$\begin{aligned} \mathbb{E} \left[ \|X - \hat{X}\|^2 \right] &= \mathbb{E} \left[ \|X - X^*\|^2 \right] + \mathbb{E} \left[ \|\hat{X} - X^*\|^2 \right] \\ &\geq D^* + W_2^2(p_{\hat{X}}, p_{X^*}) \\ &\geq D^* + (P^* - P)_+^2, \end{aligned}$$

where the last inequality follows from (40). Hence  $D(P) = \min_{p_{\hat{X}|Y}: W_2(p_{\hat{X}}, p_X) \leq P} \mathbb{E}_{p_{\hat{X}|Y}} \left[ \|X - \hat{X}\|^2 \right] \geq D^* + [(P^* - P)_+]^2$ .  $\square$

### B.1.1 Proof of Theorem 3

**Theorem 3.** Let  $\hat{X}_0$  be an estimator achieving perception index 0 and MSE  $D(0)$ . Then for any  $P \in [0, P^*]$ , the estimator

$$\hat{X}_P = \left(1 - \frac{P}{P^*}\right) \hat{X}_0 + \frac{P}{P^*} X^* \quad (41)$$

is optimal for perception index  $P$ , namely, it achieves perception index  $P$  and distortion  $D(P)$ .

Let us prove a stronger result, from which Theorem 3 will follow.

**Lemma 5.** Let  $\hat{X}_\varepsilon$  be an estimator (independent of  $X$  given  $Y$ ) achieving  $W_2(p_X, p_{\hat{X}_\varepsilon}) \leq \varepsilon_P$  and  $\mathbb{E} \left[ \|\hat{X}_\varepsilon - X^*\|^2 \right] \leq (1 + \varepsilon_D)^2 W_2^2(p_X, p_{X^*})$  for some  $\varepsilon_D, \varepsilon_P \geq 0$ . Given  $0 \leq P \leq P^* = W_2(p_X, p_{X^*})$ , consider the estimator

$$\hat{X}_P = \left(1 - \frac{P}{P^*}\right) \hat{X}_\varepsilon + \frac{P}{P^*} X^*. \quad (42)$$

Then  $\hat{X}_P$  achieves  $\mathbb{E} \left[ \|X - \hat{X}_P\|^2 \right] \leq D^* + (1 + \varepsilon_D)^2 (P^* - P)^2$  with perception index  $\varepsilon_P + (1 + \varepsilon_D)P$ . When  $\varepsilon_D, \varepsilon_P = 0$ , namely  $\hat{X}_\varepsilon$  is an optimal perfect perceptual quality estimator,  $\hat{X}_P$  is an optimal estimator under perception constraint  $P$ , which proves Theorem 3.

*Proof.*  $W_2^2(p_{\hat{X}_\varepsilon}, p_{\hat{X}_P}) \leq \mathbb{E} \left[ \|\hat{X}_\varepsilon - \hat{X}_P\|^2 \right]$ , and using the triangle inequality

$$\begin{aligned} W_2(p_X, p_{\hat{X}_P}) &\leq W_2(p_X, p_{\hat{X}_\varepsilon}) + W_2(p_{\hat{X}_\varepsilon}, p_{\hat{X}_P}) \\ &\leq \varepsilon_P + \sqrt{\mathbb{E} \left[ \|\hat{X}_\varepsilon - \hat{X}_P\|^2 \right]} \\ &= \varepsilon_P + \sqrt{\frac{P^2}{W_2^2(p_X, p_{X^*})} \mathbb{E} \left[ \|\hat{X}_\varepsilon - X^*\|^2 \right]} \\ &\leq \varepsilon_P + P(1 + \varepsilon_D), \end{aligned}$$

where the equality is based on (42). A direct calculation of the distortion yields

$$\begin{aligned}\mathbb{E} \left[ \|X^* - \hat{X}_P\|^2 \right] &= \left( 1 - \frac{P}{W_2(p_X, p_{X^*})} \right)^2 \mathbb{E} \left[ \|X^* - \hat{X}_\varepsilon\|^2 \right] \\ &\leq (1 + \varepsilon_D)^2 (W_2(p_X, p_{X^*}) - P)^2, \\ \mathbb{E} \left[ \|X - \hat{X}_P\|^2 \right] &= D^* + \mathbb{E} \left[ \|X^* - \hat{X}_P\|^2 \right] \\ &\leq D^* + (1 + \varepsilon_D)^2 (W_2(p_X, p_{X^*}) - P)^2.\end{aligned}$$

When  $\varepsilon_D, \varepsilon_P = 0$  we have  $W_2(p_X, p_{\hat{X}_P}) \leq P$  and  $\mathbb{E} \left[ \|X - \hat{X}_P\|^2 \right] \leq D^* + (W_2(p_X, p_{X^*}) - P)^2$ . From Lemma 4, the latter inequality is achieved with equality. Note that since here  $\mathbb{E} \left[ \|\hat{X}_\varepsilon - X^*\|^2 \right] = W_2^2(p_X, p_{X^*})$ , the distributions of  $\{\hat{X}_P, P \in [0, W_2(p_X, p_{X^*})]\}$  form a constant-speed geodesic, hence  $W_2(p_X, p_{\hat{X}_P}) = P$ .  $\square$

**Corollary 1.** *When  $X^*$  has a density,  $\hat{X}_0$  (hence  $\hat{X}_P$ ) can be obtained via a deterministic transformation of  $Y$ .*

*Proof.* Since the distribution of  $X^*$  is absolutely continuous, we have an optimal map  $T_{p_{X^*} \rightarrow p_X}$  between the distributions of  $X^*$  and  $X$  (see discussion in App. A.2). Namely, we have that  $\hat{X}_0 = T_{p_{X^*} \rightarrow p_X}(X^*)$  is an optimal estimator with perception index 0. Thus, according to (15)  $\hat{X}_P = \left(1 - \frac{P}{P^*}\right) T_{p_{X^*} \rightarrow p_X}(X^*) + \frac{P}{P^*} X^*$  are optimal estimators, which in this case are given by a deterministic function of  $Y$ .  $\square$

## B.2 Proof of Theorem 1

With Theorem 3 and Lemma 5 in hand, we are now ready to prove our main result.

**Theorem. 1.** *The DP function (2) is given by*

$$D(P) = D^* + [(P^* - P)_+]^2. \quad (43)$$

*Furthermore, an estimator achieving perception index  $P$  and distortion  $D(P)$  can always be constructed by applying a (possibly stochastic) transformation to  $X^*$ .*

*Proof.* When  $P \geq P^*$  the result is trivial since  $D(P) = D^*$ . Let us focus on  $P < P^*$ . Since  $X, X^* \in \mathbb{R}^{n_x}$ , we have an optimal plan  $p_{\hat{X}_0, X^*}$  between their distributions, attaining  $P^*$  [2, 20]. We then have an optimal estimator  $\hat{X}_0$  with perception index 0, which is given by this joint distribution hence achieving  $\mathbb{E} \left[ \|\hat{X}_0 - X^*\|^2 \right] = (P^*)^2$  (for the connection between  $p_{\hat{X}_0, X^*}$  and the choice of  $p_{\hat{X}_0|Y}$ , see Remark about uniqueness in Sec. 3.1). For any perception  $P < P^*$ , consider  $\hat{X}_P$  given by (41). We have  $W_2(p_X, p_{\hat{X}_P}) = P$ , and (see Theorem 3's proof)

$$\mathbb{E} \left[ \|X - \hat{X}_P\|^2 \right] \leq D^* + (W_2(p_X, p_{X^*}) - P)^2,$$

hence  $D(P) \leq D^* + [(P^* - P)_+]^2$ . On the other hand, we have (Lemma 4)  $D(P) \geq D^* + [(P^* - P)_+]^2$ , which completes the proof.  $\square$

## B.3 The Gaussian setting

In this Section we prove Theorems 4 and 5. We begin by proving Theorem 5, and then show that Theorem 4 follows as a special case. Recall that

$$(G^*)^2 = \text{Tr} \left\{ \Sigma_X + \Sigma_{X^*} - 2 \left( \Sigma_X^{1/2} \Sigma_{X^*} \Sigma_X^{1/2} \right)^{1/2} \right\} \quad (44)$$

and

$$T^* = \Sigma_X^{-1/2} \left( \Sigma_X^{1/2} \Sigma_{X^*} \Sigma_X^{1/2} \right)^{1/2} \Sigma_X^{-1/2}. \quad (45)$$

**Theorem. 5.** Consider the setting of Theorem 4 in the main text. Let  $\Sigma_{\hat{X}_0 Y} \in \mathbb{R}^{n_x \times n_y}$  satisfy

$$\Sigma_{\hat{X}_0 Y} \Sigma_Y^{-1} \Sigma_{Y X} = \Sigma_X^{\frac{1}{2}} (\Sigma_X^{\frac{1}{2}} \Sigma_{X^*} \Sigma_X^{\frac{1}{2}})^{\frac{1}{2}} \Sigma_X^{-\frac{1}{2}}, \quad (46)$$

and  $W_0$  be a zero-mean Gaussian noise with covariance

$$\Sigma_{W_0} = \Sigma_X - \Sigma_{\hat{X}_0 Y} \Sigma_Y^{-1} \Sigma_{\hat{X}_0 Y}^T \succeq 0 \quad (47)$$

that is independent of  $Y, X$ . Then, for any  $P \in [0, G^*]$ , an optimal estimator with perception index  $P$  can be obtained by

$$\hat{X}_P = \left( \left(1 - \frac{P}{G^*}\right) \Sigma_{\hat{X}_0 Y} + \frac{P}{G^*} \Sigma_{XY} \right) \Sigma_Y^{-1} Y + \left(1 - \frac{P}{G^*}\right) W_0. \quad (48)$$

The estimator given in (50) is one solution to (46)-(47), but it is generally not unique.

*Proof.* (Theorem 5) Let  $\hat{X}_0 \triangleq \Sigma_{\hat{X}_0 Y} \Sigma_Y^{-1} Y + W_0$  where  $\Sigma_{\hat{X}_0 Y}$  satisfies (46)-(47). It is easy to see that  $\hat{X}_0 \sim \mathcal{N}(0, \Sigma_X)$  and it is jointly Gaussian with  $(X, Y, X^*)$ . We have by (46)

$$\mathbb{E} \left[ X^* \hat{X}_0^T \right] = \Sigma_{XY} \Sigma_Y^{-1} \Sigma_{Y \hat{X}_0} = \Sigma_X^{-1/2} (\Sigma_X^{1/2} \Sigma_{X^*} \Sigma_X^{1/2})^{1/2} \Sigma_X^{1/2}, \quad (49)$$

hence using (47),

$$\begin{aligned} \mathbb{E} \left[ \|\hat{X}_0 - X^*\|^2 \right] &= \text{Tr} \left\{ \Sigma_X + \Sigma_{X^*} - 2\mathbb{E} \left[ X^* \hat{X}_0^T \right] \right\} \\ &= \text{Tr} \left\{ \Sigma_X + \Sigma_{X^*} - 2\Sigma_X^{-1/2} (\Sigma_X^{1/2} \Sigma_{X^*} \Sigma_X^{1/2})^{1/2} \Sigma_X^{1/2} \right\} \\ &= \text{Tr} \left\{ \Sigma_X + \Sigma_{X^*} - 2(\Sigma_X^{1/2} \Sigma_{X^*} \Sigma_X^{1/2})^{1/2} \right\} \\ &= G^2(\Sigma_X, \Sigma_{X^*}) \\ &= (G^*)^2. \end{aligned}$$

Summarizing,  $\hat{X}_0$  is an optimal perfect perceptual quality estimator. Note that (48) can be written as

$$\hat{X}_P = \left(1 - \frac{P}{G^*}\right) \hat{X}_0 + \frac{P}{G^*} X^*,$$

and by Theorem 3 we have that it is an optimal estimator.  $\square$

Before proceeding to the proof of Theorem 4, let us introduce some auxiliary facts.

**Lemma 6.** Let  $\Sigma, \Sigma_{X^*} \in \mathbb{R}^{n \times n}$  be (symmetric) PSD matrices, and  $\Sigma_X \in \mathbb{R}^{n \times n}$  is PD. Denote  $T^* = \Sigma_X^{-\frac{1}{2}} \left( \Sigma_X^{\frac{1}{2}} \Sigma_{X^*} \Sigma_X^{\frac{1}{2}} \right)^{\frac{1}{2}} \Sigma_X^{-\frac{1}{2}}$ . Then:

1.  $\text{Ker}\{\Sigma\} = \text{Ker}\{\Sigma^{\frac{1}{2}}\}$ .
2.  $\text{Ker}\{\Sigma_{X^*}\} \subseteq \text{Ker}\left\{ \Sigma_X^{\frac{1}{2}} (\Sigma_X^{\frac{1}{2}} \Sigma_{X^*} \Sigma_X^{\frac{1}{2}})^{\frac{1}{2}} \Sigma_X^{-\frac{1}{2}} \right\} = \text{Ker}\{\Sigma_X T^*\}$ , and we have  $\Sigma_X T^* \Sigma_{X^*}^\dagger \Sigma_X = \Sigma_X T^*$ .

*Proof.* (1) Let  $\Sigma$  be PSD. Since it is real and symmetric it is diagonalizable,  $\Sigma = UDU^T$  and  $\Sigma^{1/2} = UD^{1/2}U^T$  where  $D$  is a diagonal matrix with non-negative entries which are the eigenvalues of  $\Sigma$ . We have  $\text{Ker}\{D\} = \text{Ker}\{D^{1/2}\} = \{v \in \mathbb{R}^n : v_i = 0 \forall i : D_{i,i} \neq 0\}$  and since  $U$  is full-rank,  $\text{Ker}\{\Sigma\} = \text{Ker}\{\Sigma^{1/2}\} = U\text{Ker}\{D\}$ .

(2) Assume  $\Sigma_{X^*} v = 0$ . We have  $(\Sigma_X^{1/2} \Sigma_{X^*} \Sigma_X^{1/2}) \Sigma_X^{-1/2} v = 0$ , implying that  $\Sigma_X^{-1/2} v \in \text{Ker}\{(\Sigma_X^{1/2} \Sigma_{X^*} \Sigma_X^{1/2})\} = \text{Ker}\{(\Sigma_X^{1/2} \Sigma_{X^*} \Sigma_X^{1/2})^{1/2}\}$ . The equality is true since  $\Sigma_X^{1/2} \Sigma_{X^*} \Sigma_X^{1/2} = \Sigma_X^{1/2} \Sigma_{X^*}^{1/2} (\Sigma_X^{1/2} \Sigma_{X^*}^{1/2})^T$  is PSD, and we use (1). To conclude, we have

$$\Sigma_X T^* v = \Sigma_X^{1/2} (\Sigma_X^{1/2} \Sigma_{X^*} \Sigma_X^{1/2})^{1/2} \Sigma_X^{-1/2} v = 0 \implies \text{Ker}\{\Sigma_{X^*}\} \subseteq \text{Ker}\{\Sigma_X T^*\}.$$

Recall now that  $(I - \Sigma_{X^*}^\dagger \Sigma_{X^*})$  is a projection onto  $\text{Ker}\{\Sigma_{X^*}\}$ . We have  $\Sigma_X T^* (I - \Sigma_{X^*}^\dagger \Sigma_{X^*}) = 0$ , yielding  $\Sigma_X T^* \Sigma_{X^*}^\dagger \Sigma_{X^*} = \Sigma_X T^*$ .  $\square$

The following Lemma is a reminder of the Schur Complement and its properties.

**Lemma 7.** [Schur complement]. Let  $\Sigma = \begin{bmatrix} A & B \\ B^T & C \end{bmatrix}$  be a symmetric matrix where  $A$  is PD. Then  $\Sigma/A \triangleq C - B^T A^{-1} B$  is the Schur complement of  $\Sigma$ , and we have that  $\Sigma$  is PSD iff  $\Sigma/A$  is PSD.

We are now ready to prove Theorem 4.

**Theorem. 4.** Assume  $X$  and  $Y$  are zero-mean jointly Gaussian random vectors with  $\Sigma_X, \Sigma_Y \succ 0$ . Then for any  $P \in [0, G^*]$ , an estimator with perception index  $P$  and MSE  $D(P)$  can be constructed as

$$\hat{X}_P = \left( \left(1 - \frac{P}{G^*}\right) \Sigma_X^{-\frac{1}{2}} \left( \Sigma_X^{-\frac{1}{2}} \Sigma_{X^*} \Sigma_X^{-\frac{1}{2}} \right)^{\frac{1}{2}} \Sigma_X^{-\frac{1}{2}} \Sigma_{X^*}^\dagger + \frac{P}{G^*} I \right) \Sigma_{XY} \Sigma_Y^{-1} Y + \left(1 - \frac{P}{G^*}\right) W, \quad (50)$$

where  $W$  is a zero-mean Gaussian noise with covariance  $\Sigma_W = \Sigma_X^{1/2} (I - \Sigma_X^{1/2} T^* \Sigma_{X^*}^\dagger T^* \Sigma_X^{1/2}) \Sigma_X^{1/2}$ , which is independent of  $Y, X$ .

*Proof.* We observe that (50) is a special case of (48), where  $\Sigma_{\hat{X}_0 Y} = \Sigma_{Y \hat{X}_0}^T = \Sigma_X^{-\frac{1}{2}} \left( \Sigma_X^{-\frac{1}{2}} \Sigma_{X^*} \Sigma_X^{-\frac{1}{2}} \right)^{\frac{1}{2}} \Sigma_X^{-\frac{1}{2}} \Sigma_{X^*}^\dagger \Sigma_{XY}$ . We now show that  $\Sigma_{\hat{X}_0 Y}$  has the desired properties (46)-(47). By substitution,

$$\begin{aligned} \Sigma_{\hat{X}_0 Y} \Sigma_Y^{-1} \Sigma_{Y X} &= \Sigma_X^{-\frac{1}{2}} \left( \Sigma_X^{-\frac{1}{2}} \Sigma_{X^*} \Sigma_X^{-\frac{1}{2}} \right)^{\frac{1}{2}} \Sigma_X^{-\frac{1}{2}} \Sigma_{X^*}^\dagger \left( \Sigma_{XY} \Sigma_Y^{-1} \Sigma_{Y X} \right) \\ &= \Sigma_X^{-\frac{1}{2}} \left( \Sigma_X^{-\frac{1}{2}} \Sigma_{X^*} \Sigma_X^{-\frac{1}{2}} \right)^{\frac{1}{2}} \Sigma_X^{-\frac{1}{2}} \Sigma_{X^*}^\dagger \Sigma_{X^*} \\ &= \Sigma_X^{-\frac{1}{2}} \left( \Sigma_X^{-\frac{1}{2}} \Sigma_{X^*} \Sigma_X^{-\frac{1}{2}} \right)^{\frac{1}{2}} \Sigma_X^{-\frac{1}{2}}. \end{aligned}$$

The last equality is due to Lemma 6.

Recall  $\Sigma_{X^*}^\dagger \Sigma_{X^*} \Sigma_{X^*}^\dagger = \Sigma_{X^*}^\dagger$ , and we denote  $T^* = \Sigma_X^{-\frac{1}{2}} \left( \Sigma_X^{-\frac{1}{2}} \Sigma_{X^*} \Sigma_X^{-\frac{1}{2}} \right)^{\frac{1}{2}} \Sigma_X^{-\frac{1}{2}}$ . We now have

$$\begin{aligned} \Sigma_{Y \hat{X}_0} \Sigma_X^{-1} \Sigma_{\hat{X}_0 Y} &= \Sigma_{Y X} \Sigma_{X^*}^\dagger T^* \Sigma_X \Sigma_X^{-1} \Sigma_X T^* \Sigma_{X^*}^\dagger \Sigma_{XY} \\ &= \Sigma_{Y X} \Sigma_{X^*}^\dagger \Sigma_X^{-\frac{1}{2}} \left( \Sigma_X^{-\frac{1}{2}} \Sigma_{X^*} \Sigma_X^{-\frac{1}{2}} \right)^{\frac{1}{2}} \Sigma_X^{-\frac{1}{2}} \Sigma_{X^*}^\dagger \Sigma_{XY} \\ &= \Sigma_{Y X} \Sigma_{X^*}^\dagger \Sigma_{X^*} \Sigma_{X^*}^\dagger \Sigma_{XY} \\ &= \Sigma_{Y X} \Sigma_{X^*}^\dagger \Sigma_{XY}, \end{aligned}$$

hence

$$\Sigma_Y - \Sigma_{Y \hat{X}_0} \Sigma_X^{-1} \Sigma_{\hat{X}_0 Y} = \Sigma_Y - \Sigma_{Y X} \Sigma_{X^*}^\dagger \Sigma_{XY} = \Sigma_{Y|X^*} \succeq 0. \quad (51)$$

Since  $\Sigma_X, \Sigma_Y \succ 0$ , (51) is the Schur complement of  $\begin{bmatrix} \Sigma_X & \Sigma_{\hat{X}_0 Y} \\ \Sigma_{Y \hat{X}_0} & \Sigma_Y \end{bmatrix} \succeq 0$ , yielding

$$\Sigma_W = \Sigma_X - \Sigma_{\hat{X}_0 Y} \Sigma_Y^{-1} \Sigma_{\hat{X}_0 Y}^T \succeq 0. \quad (52)$$

□

**Corollary 2** (Non-singular special case). In the case where  $\Sigma_{X^*}$  is invertible,  $\Sigma_{\hat{X}_0 Y} = \Sigma_X T^* \Sigma_{X^*}^{-1} \Sigma_{XY}$  in the proof of Theorem 4, and it is easy to see that the noise covariance is  $\Sigma_W = 0$ . In this case  $\Sigma_{\hat{X}_0 Y}$  is the unique solution to (46)-(47). This means that  $\hat{X}_0$  (hence  $\hat{X}_P$ ) is a deterministic function of  $Y$ .

*Proof.* We first show  $\Sigma_W = 0$ . Let  $M_P = \Sigma_{\hat{X}_0 Y} = \Sigma_X T^* \Sigma_{X^*}^{-1} \Sigma_{XY}$ , then

$$\begin{aligned} \Sigma_W &= \Sigma_X - M_P \Sigma_Y^{-1} M_P^T \\ &= \Sigma_X - \Sigma_X T^* \Sigma_{X^*}^{-1} \Sigma_{XY} \Sigma_Y^{-1} \Sigma_{Y X} \Sigma_{X^*}^{-1} T^* \Sigma_X \\ &= \Sigma_X - \Sigma_X \Sigma_X^{-1/2} \underbrace{(\Sigma_X^{1/2} \Sigma_{X^*} \Sigma_X^{1/2})^{1/2} (\Sigma_X^{-1/2} \Sigma_{X^*}^{-1} \Sigma_X^{-1/2})}_{=(\Sigma_X^{1/2} \Sigma_{X^*} \Sigma_X^{1/2})^{-1}} (\Sigma_X^{1/2} \Sigma_{X^*} \Sigma_X^{1/2})^{1/2} \Sigma_X^{-1/2} \Sigma_X \\ &= \Sigma_X - \Sigma_X \Sigma_X^{-1/2} \Sigma_X^{-1/2} \Sigma_X = 0. \end{aligned}$$

Now, assume  $M$  is a solution to (46)-(47), then  $M_\Delta = M_P - M$  satisfies  $M_\Delta \Sigma_Y^{-1} \Sigma_{YX} = 0$  and

$$\begin{aligned} & \Sigma_X - M \Sigma_Y^{-1} M^T = \\ & \Sigma_X - [M_P \Sigma_Y^{-1} M_P^T + M_\Delta \Sigma_Y^{-1} M_\Delta^T - M_\Delta \Sigma_Y^{-1} M_P^T - M_P \Sigma_Y^{-1} M_\Delta^T] \succeq 0. \end{aligned}$$

But,  $M_\Delta \Sigma_Y^{-1} M_P^T = (M_\Delta \Sigma_Y^{-1} \Sigma_{YX}) \Sigma_{X^*}^{-1} T^* \Sigma_X = 0$  and  $\Sigma_X - M_P \Sigma_Y^{-1} M_P^T = 0$ , yielding  $M_\Delta \Sigma_Y^{-1} M_\Delta^T \preceq 0$ . Since  $M_\Delta \Sigma_Y^{-1} M_\Delta^T$  is PSD and  $\Sigma_Y^{-1}$  is PD, we conclude that  $M_\Delta = 0$ .  $\square$

## C Relations with other divergences

While in Section 3 we focused our attention on the MSE –  $W_2$  tradeoff, in this section we discuss the implications of our results on the DP tradeoff with other divergences. In particular, we show that when considering the MSE distortion, (8) establishes a lower bound on a class of DP functions. Note that at the point  $P = 0$ , the DP function coincides with (8) for all plausible divergences.

Let  $d_p(\cdot, \cdot)$  be a divergence between probability measures, and let  $D_{d_p}(P)$  be the DP function w.r.t. this divergence, given by (1), where MSE is used to measure distortion. Here,  $D(P)$  will denote  $D_{W_2}(P)$ , given by (8). We can now write, similarly to (14),

$$D_{d_p}(P) = D^* + \inf_{d_p(p_X, p_{\hat{X}}) \leq P} W_2^2(p_{\hat{X}}, p_{X^*}). \quad (53)$$

In cases where  $d_p(p_X, p_{\hat{X}}) \geq W_2(p_X, p_{\hat{X}})$  for all  $p_{\hat{X}}$ , the constraint set  $\{p_{\hat{X}} : d_p(p_X, p_{\hat{X}}) \leq P\}$  is contained in  $\{p_{\hat{X}} : W_2(p_X, p_{\hat{X}}) \leq P\}$ . Therefore, from (53), we have that

$$D_{d_p}(P) \geq D^* + \inf_{W_2(p_X, p_{\hat{X}}) \leq P} W_2^2(p_{\hat{X}}, p_{X^*}) = D(P). \quad (54)$$

The last equality follows from (14), where the infimum is attained. The above result holds true for any Wasserstein distance  $W_p$  with  $p \geq 2$ , since when  $p \geq q \geq 1$ , we have that  $W_p(p_X, p_{\hat{X}}) \geq W_q(p_X, p_{\hat{X}})$  for all  $p_{\hat{X}}, p_X$  [20].

For the case of  $W_1$ , let us denote  $P_1^* \triangleq W_1(p_X, p_{X^*})$ . From the triangle inequality, for every estimator satisfying  $W_1(p_X, p_{\hat{X}}) \leq P$  we have

$$P_1^* \leq W_1(p_X, p_{\hat{X}}) + W_1(p_{\hat{X}}, p_{X^*}) \leq P + W_2(p_{\hat{X}}, p_{X^*}),$$

which together with (53) yields

$$D(P) \geq D_{W_1}(P) \geq D^* + [(P_1^* - P)_+]^2. \quad (55)$$

A similar result can be obtained for any  $W_p, p \in [1, 2]$ .

Note that when the support of  $p_X$  and  $p_{\hat{X}}$  is compact with diameter  $R$ , we have  $R^{(p-q)/p} W_q^{q/p}(p_{\hat{X}}, p_X) \geq W_p(p_{\hat{X}}, p_X)$  for any  $p \geq q \geq 1$  [20]. Particularly,  $R^{1/2} W_1^{1/2}(p_{\hat{X}}, p_X) \geq W_2(p_{\hat{X}}, p_X)$ , and therefore  $W_1(p_{\hat{X}}, p_X) \leq P$  implies  $W_2(p_{\hat{X}}, p_X) \leq \sqrt{RP}$ , so we have from (53) that

$$D_{W_1}(P) \geq D(\sqrt{RP}). \quad (56)$$

In the Gaussian setting where  $X \sim \mathcal{N}(0, I)$ , we have by Talagrand's Inequality [28, 19]  $W_2(p_{\hat{X}}, p_X) \leq \sqrt{2d_{KL}(p_{\hat{X}} \| p_X)}$  for  $p_{\hat{X}} \ll p_X$ , hence we obtain, similarly to (54)

$$D_{d_{KL}}(P) \geq D(\sqrt{2P}). \quad (57)$$

We summarize these results in Appendix F.

## D Settings with commuting covariances

In many practical problems, covariance matrices may have the commutative relation  $\Sigma_X \Sigma_{X^*} = \Sigma_{X^*} \Sigma_X$ . This is the case, for example, of circulant or large Toeplitz matrices [9]. For natural images



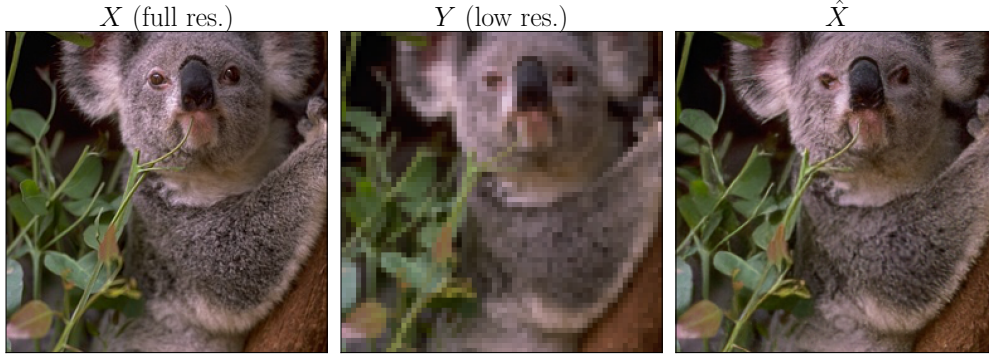

Figure 5: A visual demonstration of SR image enhancement.  $X$  is a full-resolution reference image and  $Y$  is a  $\times 4$  downsampled version of  $X$ .  $\hat{X}$  is a reconstruction of  $X$  based on  $Y$ .

this is a reasonable assumption since shift-invariance induces diagonalization by the Fourier basis [30].

In the Gaussian settings of Sec. 3.3, where  $\Sigma_X, \Sigma_{X^*}$  commute it is easy to see that the Gelbrich distance between them can be written as

$$G^* = G((\mu_X, \Sigma_X), (\mu_{X^*}, \Sigma_{X^*})) = \|\Sigma_X^{1/2} - \Sigma_{X^*}^{1/2}\|_F.$$

$\|A\|_F = \sqrt{\text{Tr}\{A^T A\}}$  is the Frobenius norm. This is due to the fact that  $\Sigma_X^{1/2}, \Sigma_{X^*}^{1/2}$  also commute. In order to achieve  $\mathbb{E}[\|\hat{X}_0 - X^*\|^2] = (G^*)^2$ , an optimal perfect perceptual quality estimator has to satisfy (49) which now takes the form

$$\mathbb{E}[X^* \hat{X}_0^T] = \Sigma_X^{1/2} \Sigma_{X^*}^{1/2}.$$

It is easy to see that estimators obtained by  $\hat{X}_0, X^*$  using (15) are Gaussian with zero mean and covariance  $\Sigma_P$ , given by

$$\Sigma_P^{\frac{1}{2}} = \left(1 - \frac{P}{G^*}\right) \Sigma_X^{\frac{1}{2}} + \frac{P}{G^*} \Sigma_{X^*}^{\frac{1}{2}}. \quad (58)$$

Pay attention that since the roots commute,  $\Sigma_P$  commutes with  $\Sigma_X, \Sigma_{X^*}$ , and

$$\|\Sigma_X^{\frac{1}{2}} - \Sigma_P^{\frac{1}{2}}\|_F = P, \quad \|\Sigma_P^{\frac{1}{2}} - \Sigma_{X^*}^{\frac{1}{2}}\|_F = G^* - P.$$

This further reduces the geometry of the problem to the  $l^2$ -distance between commuting matrices.

## E Numerical illustration

### E.1 Super-resolution problem

In super-resolution (SR) problems, the objective is to enhance the resolution of a given image. This setting can be viewed as an image reconstruction problem, where we assume  $X$  is an unknown image of the desired resolution, and the input to the algorithm is  $Y$ , a downsampled (degraded) version of  $X$ . The output of the algorithm is then  $\hat{X} \sim p_{\hat{X}|Y}$ , an estimation of  $X$  based on  $Y$ .

Figure 5 visually demonstrates this setting with a concrete example.

## E.2 Simulation details

In Section 5 we construct an experimental setup, demonstrating our results. Figure 3 presents the evaluation of 13 super resolution algorithms on the BSD100 dataset, where we compare MSE distortion, and Gelbrich and FID perceptual indices. Low resolution images were obtained by  $4\times$  downsampling BSD100 images using a bicubic kernel.

For each algorithm, we acquire 100 RGB images (5000 for the explorable SR method) which are reconstructions of BSD100 images. To compute the Gelbrich index, we extract  $9 \times 9$  patches from the RGB images, and then estimate

$$m_{\text{Alg}} = \frac{1}{N_{\text{patches}}} \sum_i p_i, \quad \Sigma_{\text{Alg}} = \frac{1}{N_{\text{patches}} - 1} (p_i - m_{\text{Alg}})(p_i - m_{\text{Alg}})^T,$$

where  $p_i$  is the  $i$ -th patch (a 243-row vector) and  $N_{\text{patches}} = 1, 643, 200$ . We compute using (4)

$$\text{MSE}_{\text{Alg}} = \frac{1}{243 \times N_{\text{patches}}} \sum_i \|p_i^{\text{Alg}} - p_i^{\text{BSD100}}\|^2, \quad P_{\text{Alg}} = \sqrt{\frac{1}{243}} G((m_{\text{BSD100}}, \Sigma_{\text{BSD100}}), (m_{\text{Alg}}, \Sigma_{\text{Alg}})).$$

The stochastic explorable SR method [3] is evaluated using 50 different SR outputs for each input image, hence for this method  $N_{\text{patches}} = 50 \times 1, 643, 200$ .

FID values are calculated on  $299 \times 299$  patches, where for the explorable SR method we use 40 different outputs for each input.

The estimators  $\hat{X}_t$  are constructed using per-pixel interpolation between EDSR and ESRGAN,

$$\hat{X}_t = tX_{\text{EDSR}} + (1 - t)X_{\text{ESRGAN}}.$$

## E.3 Visual illustration

Here we present a visual comparison between SR methods and our constructed estimators, achieving roughly the same MSE but with a lower perception index. We also present EDSR, ESRGAN, the low-resolution input, and the ground-truth BSD100 images.

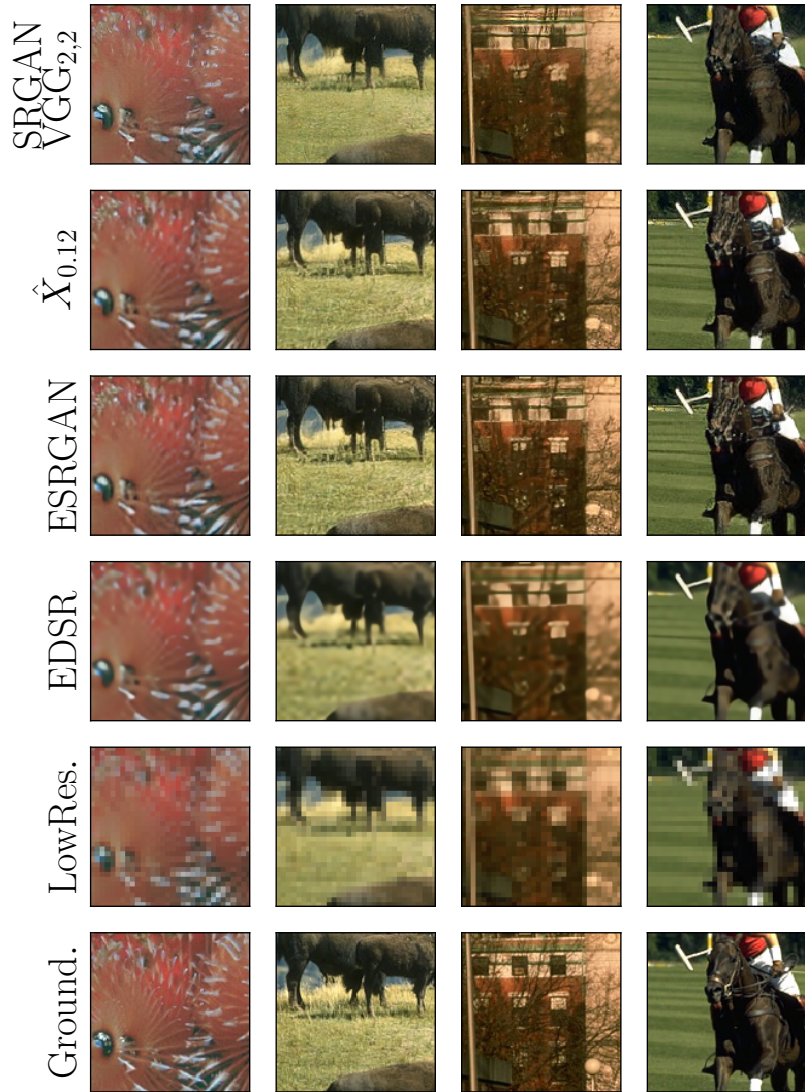

Figure 6: A visual comparison between SRGAN-VGG<sub>2,2</sub> (RMSE: 18.08, P: 5.05), and  $\hat{X}_{0.12}$  (18.14, 2.59).

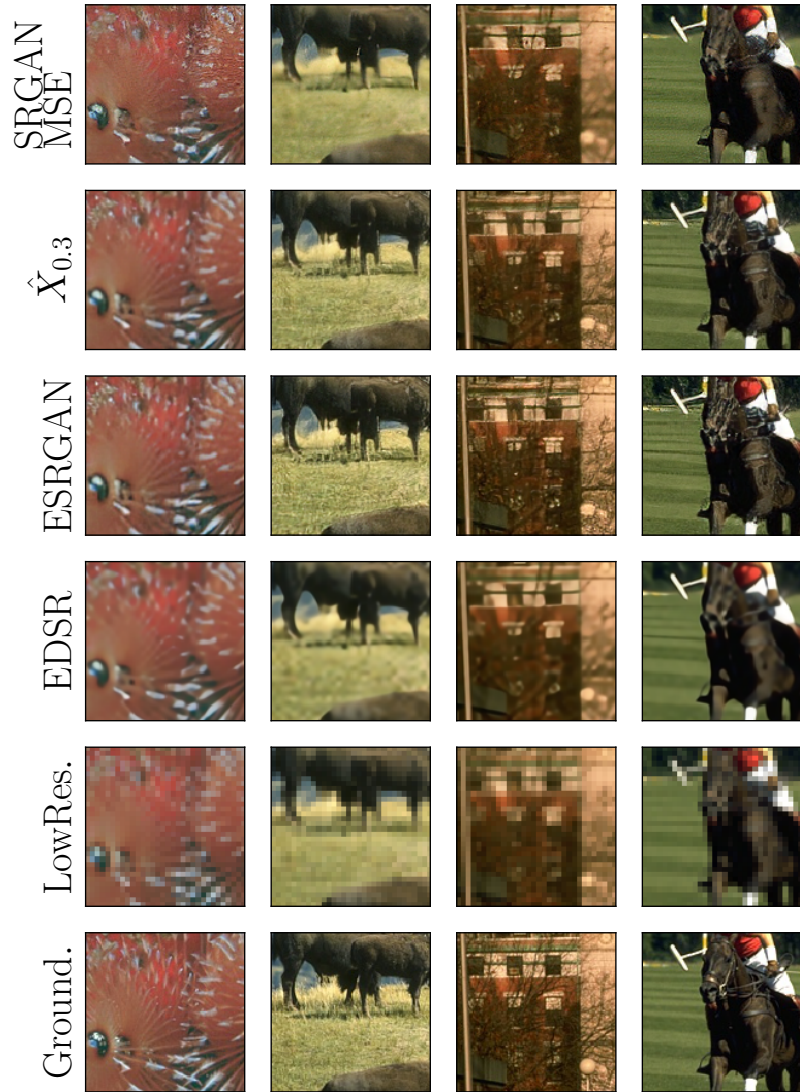

Figure 7: A visual comparison between SRGAN-MSE (RMSE: 16.93, P: 5.85), and  $\hat{X}_{0.3}$  (16.82, 4.32).

## F Table of main results

For convenience, we summarize our results in the following Table.

Table 1: Main results

| Result                    | notation    | setting       |                                                                              | remarks                                                                                                                                                                                                                                                                                       |
|---------------------------|-------------|---------------|------------------------------------------------------------------------------|-----------------------------------------------------------------------------------------------------------------------------------------------------------------------------------------------------------------------------------------------------------------------------------------------|
| <b>D-P function</b>       | $D(P)$      | MSE- $W_2$    | $D(P) = D^* + [(P^* - P)_+]^2$                                               | $P^* = W_2(p_X, p_{X^*})$                                                                                                                                                                                                                                                                     |
|                           |             | Gaussian      | $D(P) = D^* + [(G^* - P)_+]^2$                                               | $G^* = G(\Sigma_X, \Sigma_{X^*})$                                                                                                                                                                                                                                                             |
| <b>Optimal estimators</b> | $\hat{X}_P$ | MSE- $W_2$    | $(1 - \frac{P}{P^*}) \hat{X}_0 + \frac{P}{P^*} X^*$                          |                                                                                                                                                                                                                                                                                               |
|                           |             | Gaussian      | $(\alpha \Sigma_X T^* \Sigma_{X^*}^\dagger + (1 - \alpha) I) X^* + \alpha W$ | $\alpha = (1 - \frac{P}{G^*}), X^* = \Sigma_{XY} \Sigma_Y^{-1} Y$<br>$T^* = \Sigma_X^{-\frac{1}{2}} (\Sigma_X^{\frac{1}{2}} \Sigma_{X^*} \Sigma_X^{\frac{1}{2}})^{\frac{1}{2}} \Sigma_X^{-\frac{1}{2}}$<br>$W \sim \mathcal{N}(0, \Sigma_X - \Sigma_X T^* \Sigma_{X^*}^\dagger T^* \Sigma_X)$ |
| <b>Lower bounds</b>       |             | MSE- $W_2$    | $D(P) \geq D^* + [(G^* - P)_+]^2$                                            |                                                                                                                                                                                                                                                                                               |
|                           |             | MSE- $W_p$    | $D_{W_p}(P) \geq D^* + [(P^* - P)_+]^2$                                      | $p \geq 2$                                                                                                                                                                                                                                                                                    |
|                           |             | MSE- $W_1$    | $D_{W_1}(P) \geq D^* + [(P_1^* - P)_+]^2$                                    | $P_1^* = W_1(p_X, p_{X^*})$                                                                                                                                                                                                                                                                   |
|                           |             | MSE- $d_{KL}$ | $D_{d_{KL}}(P) \geq D^* + [(P^* - \sqrt{2P})_+]^2$                           | $X \sim \mathcal{N}(0, I)$                                                                                                                                                                                                                                                                    |
